# Supplementary material for: Aflatoxin B1 Impairs Bone Mineralization in Broiler Chickens
Source: MDPI journal article supplement (doi:10.3390/toxins16020078), 2024-02-02
Supplement: s1 [file s1]

# Supplementary Materials: Aflatoxin B1 Impairs Bone Mineralization in Broiler Chickens

**Supplementary Table S1.** Effect of increasing dosage of Aflatoxin B1 contaminated diet on microstructure of femoral metaphysis on day 8 <sup>1</sup>.

| Bone Region | Parameters <sup>2</sup> | Unit              | Treatment Groups <sup>3</sup> |        |        |        |        | SEM    | P-values <sup>4</sup> |                     |                        |
|-------------|-------------------------|-------------------|-------------------------------|--------|--------|--------|--------|--------|-----------------------|---------------------|------------------------|
|             |                         |                   | T1                            | T2     | T3     | T4     | T5     |        | P <sub>Model</sub>    | P <sub>Linear</sub> | P <sub>Quadratic</sub> |
| Total       | BMC                     | g                 | 0.016                         | 0.019  | 0.018  | 0.018  | 0.020  | 0.001  | 0.5944                | 0.2700              | 0.81380                |
|             | BMD                     | g/mm <sup>3</sup> | 0.28                          | 0.33   | 0.32   | 0.31   | 0.34   | 0.02   | 0.1163                | 0.0907              | 0.4325                 |
|             | TV                      | mm <sup>3</sup>   | 58.2                          | 56.2   | 56.5   | 56.7   | 57.9   | 2.8    | 0.9817                | 0.9934              | 0.5577                 |
|             | BV                      | mm <sup>3</sup>   | 25.8                          | 29.9   | 29.0   | 27.4   | 31.3   | 2.5    | 0.5777                | 0.2999              | 0.8889                 |
|             | BV/TV                   | -                 | 44.2                          | 52.6   | 51.2   | 47.7   | 53.9   | 2.7    | 0.1104                | 0.1042              | 0.5284                 |
|             | TS                      | mm <sup>2</sup>   | 94                            | 92     | 94     | 93     | 94     | 3      | 0.9887                | 0.9255              | 0.6830                 |
|             | BS                      | mm <sup>2</sup>   | 165                           | 155    | 159    | 163    | 153    | 10     | 0.8961                | 0.6146              | 0.9804                 |
|             | BS/BV                   | mm <sup>-1</sup>  | 6.6                           | 5.4    | 5.6    | 6.1    | 5.0    | 0.4    | 0.0619                | 0.0484              | 0.6849                 |
|             | BS/TV                   | mm <sup>-1</sup>  | 2.84                          | 2.77   | 2.81   | 2.86   | 2.65   | 0.09   | 0.4817                | 0.3110              | 0.4111                 |
| Cortical    | BMC                     | g                 | 0.014                         | 0.017  | 0.016  | 0.015  | 0.017  | 0.001  | 0.3981                | 0.2452              | 0.6860                 |
|             | BMD                     | g/mm <sup>3</sup> | 0.506                         | 0.544  | 0.531  | 0.530  | 0.538  | 0.013  | 0.3768                | 0.2750              | 0.3784                 |
|             | TV                      | mm <sup>3</sup>   | 26.6                          | 30.9   | 30.2   | 28.2   | 32.1   | 2.6    | 0.6387                | 0.3439              | 0.8409                 |
|             | BV                      | mm <sup>3</sup>   | 25.2                          | 29.5   | 28.7   | 26.8   | 30.9   | 2.4    | 0.5313                | 0.2820              | 0.8853                 |
|             | BV/TV                   | -                 | 94.8                          | 95.8   | 95.1   | 95.3   | 96.5   | 0.7    | 0.5683                | 0.2634              | 0.6404                 |
|             | TS                      | mm <sup>2</sup>   | 135.2                         | 129.3  | 131.2  | 132.4  | 131.3  | 3.8    | 0.8718                | 0.7110              | 0.5491                 |
|             | BS                      | mm <sup>2</sup>   | 154.7                         | 147.5  | 152.5  | 153.4  | 147.4  | 8.5    | 0.9614                | 0.7562              | 0.9571                 |
|             | BS/BV                   | mm <sup>-1</sup>  | 6.36                          | 5.19   | 5.40   | 5.84   | 4.82   | 0.38   | 0.0850                | 0.0616              | 0.7310                 |
|             | BS/TV                   | mm <sup>-1</sup>  | 6.03                          | 4.97   | 5.13   | 5.57   | 4.64   | 0.35   | 0.0954                | 0.0700              | 0.6872                 |
| Trabecular  | BMC                     | g                 | 0.0021                        | 0.0018 | 0.0017 | 0.0020 | 0.0017 | 0.0001 | 0.3461                | 0.3300              | 0.4285                 |
|             | BMD                     | g/mm <sup>3</sup> | 0.0736                        | 0.0810 | 0.0745 | 0.0770 | 0.0761 | 0.0036 | 0.6877                | 0.9246              | 0.5888                 |
|             | TV                      | mm <sup>3</sup>   | 28.12                         | 21.96  | 23.17  | 25.20  | 22.76  | 1.42   | 0.0621                | 0.1334              | 0.1597                 |

|              |                  |       |       |       |       |       |       |        |        |        |
|--------------|------------------|-------|-------|-------|-------|-------|-------|--------|--------|--------|
| <b>BV</b>    | mm <sup>3</sup>  | 0.222 | 0.181 | 0.144 | 0.244 | 0.128 | 0.048 | 0.4560 | 0.4510 | 0.9460 |
| <b>BV/TV</b> | -                | 0.786 | 0.847 | 0.623 | 0.927 | 0.509 | 0.181 | 0.5473 | 0.4436 | 0.5545 |
| <b>TS</b>    | mm <sup>2</sup>  | 63.2  | 53.6  | 55.5  | 58.6  | 54.4  | 2.1   | 0.0373 | 0.0898 | 0.1657 |
| <b>BS</b>    | mm <sup>2</sup>  | 10.5  | 7.4   | 6.6   | 10.0  | 5.6   | 1.7   | 0.2382 | 0.2152 | 0.8169 |
| <b>BS/BV</b> | mm <sup>-1</sup> | 50.0  | 45.7  | 46.7  | 44.7  | 48.3  | 3.4   | 0.8270 | 0.6861 | 0.3298 |
| <b>BS/TV</b> | mm <sup>-1</sup> | 0.379 | 0.346 | 0.287 | 0.385 | 0.227 | 0.061 | 0.3690 | 0.2021 | 0.6971 |

<sup>1</sup> Data represents mean values of six femur bone samples per treatment. SEM represents the pooled standard error of the mean for each parameter across all treatment groups.

<sup>2</sup> Parameters: BMC, bone mineral content; BMD, bone mineral density; TV, tissue volume; BV, bone volume; BV/TV, bone volume/ tissue volume; TS, tissue surface area; BS, bone surface area; BS/BV, bone surface area/ bone volume; BS/ TV, bone surface area/ tissue volume.

<sup>3</sup> Treatment groups: T1 (< 2 ppb AFB1), T2 (75-79 ppb AFB1), T3 (150 ppb AFB1), T4 (230-260 ppb AFB1), T5 (520-560 ppb AFB1).

<sup>4</sup> P-values: P<sub>Model</sub>, p-value for the whole model; P<sub>Linear</sub>, p-value for the linear regression; P<sub>Quadratic</sub>, p-value for the quadratic regression

**Supplementary Table S2.** Effect of increasing dosage of Aflatoxin B1 contaminated diet on tibial bone parameters on day 8 <sup>1</sup>.

| Parameters <sup>2</sup> | Treatment Groups <sup>3</sup> |        |        |        |        | SEM    | P-values <sup>4</sup> |                     |                        |
|-------------------------|-------------------------------|--------|--------|--------|--------|--------|-----------------------|---------------------|------------------------|
|                         | T1                            | T2     | T3     | T4     | T5     |        | P <sub>Model</sub>    | P <sub>Linear</sub> | P <sub>Quadratic</sub> |
| FBW (g)                 | 0.983                         | 0.982  | 1.031  | 1.018  | 1.053  | 0.055  | 0.8879                | 0.3466              | 0.96515                |
| DBW (g)                 | 0.327                         | 0.329  | 0.339  | 0.342  | 0.353  | 0.018  | 0.8516                | 0.2704              | 0.8540                 |
| FFDW (g)                | 0.322                         | 0.330  | 0.335  | 0.333  | 0.356  | 0.020  | 0.8419                | 0.3077              | 0.7721                 |
| AW (g)                  | 0.1454                        | 0.1525 | 0.1548 | 0.1512 | 0.1656 | 0.0108 | 0.7745                | 0.2750              | 0.8342                 |
| Ash %                   | 44.92                         | 46.11  | 46.06  | 45.38  | 46.47  | 0.64   | 0.5247                | 0.2892              | 0.7509                 |

<sup>1</sup> Data represents mean values of six tibia bone samples per treatment. SEM represents the pooled standard error of the mean for each parameter across all treatment groups.

<sup>2</sup> Parameters: FBW, fresh bone weight; DBW, dry bone weight; FFDW, fat free dry weight; AW, ash weight.

<sup>3</sup> Treatment groups: T1 (< 2 ppb AFB1), T2 (75-79 ppb AFB1), T3 (150 ppb AFB1), T4 (230-260 ppb AFB1), T5 (520-560 ppb AFB1).

<sup>4</sup> P<sub>Model</sub>, p-value for the whole model; P<sub>Linear</sub>, p-value for the linear regression; P<sub>Quadratic</sub>, p-value for the quadratic regression.

**Supplementary Table S3.** Effect of increasing dosage of Aflatoxin B1 contaminated diet on mRNA levels of calcium and phosphorus transporter genes on day 8 <sup>1</sup>.

| Genes <sup>1</sup> | Treatment Groups <sup>3</sup> |                   |                    |                    |                   | SEM  | P-values <sup>4</sup> |                     |                        |
|--------------------|-------------------------------|-------------------|--------------------|--------------------|-------------------|------|-----------------------|---------------------|------------------------|
|                    | T1                            | T2                | T3                 | T4                 | T5                |      | P <sub>Model</sub>    | P <sub>Linear</sub> | P <sub>Quadratic</sub> |
| CALB1              | 1.00                          | 1.07              | 1.80               | 1.62               | 0.87              | 0.39 | 0.4116                | 0.8166              | 0.1109                 |
| CASR               | 1.00                          | 0.71              | 0.75               | 0.68               | 0.63              | 0.22 | 0.7679                | 0.2665              | 0.6418                 |
| NCX1               | 1.00                          | 0.66              | 0.72               | 0.76               | 1.02              | 0.23 | 0.6989                | 0.8495              | 0.1713                 |
| NaPi-IIb           | 1.00                          | 1.25              | 1.20               | 1.53               | 1.10              | 0.21 | 0.4980                | 0.4868              | 0.2370                 |
| PMCA1              | 1.00 <sup>ab</sup>            | 1.40 <sup>a</sup> | 0.94 <sup>ab</sup> | 0.48 <sup>ab</sup> | 0.33 <sup>b</sup> | 0.25 | 0.0395                | 0.0086              | 0.2407                 |
| VDR                | 1.00                          | 1.89              | 2.16               | 1.41               | 2.26              | 0.38 | 0.1530                | 0.1044              | 0.4585                 |

<sup>a-b</sup> Means within a column not sharing a common letter differ significantly ( $P < 0.05$ ).

<sup>1</sup> Data are presented as mean values of fold change in mRNA expression of calcium and phosphorus transporter genes using  $2^{-\Delta\Delta C_t}$  method. Data relates to 6 jejunum samples per treatment.

<sup>2</sup> Genes: CALB1, calbindin 1; CaSR, calcium-sensing receptor; NCX1, sodium-calcium exchanger 1; NaPi-IIb, sodium-phosphate cotransporter; PMCA1b, plasma membrane calcium ATPase 1b; VDR, vitamin D receptor.

<sup>3</sup> Treatment groups: T1 (< 2 ppb AFB1), T2 (75-79 ppb AFB1), T3 (150 ppb AFB1), T4 (230-260 ppb AFB1), T5 (520-560 ppb AFB1).

<sup>4</sup> P<sub>Model</sub>, p-value for the whole model; P<sub>Linear</sub>, p-value for the linear regression; P<sub>Quadratic</sub>, p-value for the quadratic regression.

**Supplementary Table S4.** Effect of increasing dosage of Aflatoxin B1 contaminated diet on mRNA levels of tight junction proteins on day 8 <sup>1</sup>.

| Genes <sup>2</sup> | Treatment Groups <sup>3</sup> |      |      |      |      | SEM  | P-values <sup>4</sup> |                     |                        |
|--------------------|-------------------------------|------|------|------|------|------|-----------------------|---------------------|------------------------|
|                    | T1                            | T2   | T3   | T4   | T5   |      | P <sub>Model</sub>    | P <sub>Linear</sub> | P <sub>Quadratic</sub> |
| MUC2               | 1.00                          | 0.91 | 1.14 | 0.80 | 1.28 | 0.20 | 0.6294                | 0.5558              | 0.5192                 |
| CLDN1              | 1.00                          | 0.48 | 1.21 | 0.57 | 0.95 | 0.26 | 0.3939                | 0.9944              | 0.6982                 |
| ZO1                | 1.00                          | 0.72 | 0.85 | 0.57 | 0.75 | 0.12 | 0.1842                | 0.1092              | 0.284                  |
| OCLN               | 1.00                          | 1.00 | 1.09 | 1.06 | 0.99 | 0.11 | 0.9715                | 0.9103              | 0.5989                 |

<sup>1</sup> Data are presented as mean values of fold change in mRNA expression of tight junction related genes using  $2^{-\Delta\Delta Ct}$  method. Data relates to 6 jejunum samples per treatment.

<sup>2</sup> Genes: MUC2, mucin 2; CLDN1, claudin 1; ZO1, zonula occludens; and OCLN, occluding.

<sup>3</sup> Treatment groups: T1 (< 2 ppb AFB1), T2 (75-79 ppb AFB1), T3 (150 ppb AFB1), T4 (230-260 ppb AFB1), T5 (520-560 ppb AFB1).

<sup>4</sup> P<sub>Model</sub>, p-value for the whole model; P<sub>Linear</sub>, p-value for the linear regression; P<sub>Quadratic</sub>, p-value for the quadratic regression.
